# Supplementary material
Source: PubMed Central journal article supplement (PMC3225780)
Supplement: bact0103_0152SD1.pdf [file bact0103_0152SD1.pdf]

**Supplementary Table 1.** Gene products of TMA and the orthologs of YS40

| TMA Gene ID | Length (nt) | YS40 Gene ID | Length (nt) | Predicted gene product                 | Amino acid sequence identity (%) |
|-------------|-------------|--------------|-------------|----------------------------------------|----------------------------------|
| TMA_001     | 1842        | YSP_001      | 1932        | distal tail fiber protein              | 87                               |
| TMA_002     | 2646        | YSP_002      | 2646        | hypothetical protein                   | 97                               |
| TMA_003     | 2838        | YSP_003      | 2838        | portal protein                         | 99                               |
| TMA_004     | 657         | YSP_004      | 657         | hypothetical protein                   | 99                               |
| TMA_005     | 435         | YSP_005      | 435         | S-adenosylmethionine decarboxylase     | 97                               |
| TMA_006     | 225         | YSP_006      | 225         | hypothetical protein                   | 100                              |
| TMA_007     | 612         | YSP_007      | 612         | hypothetical protein                   | 99                               |
| TMA_008     | 543         | YSP_008      | 543         | dUTPase                                | 99                               |
| TMA_009     | 828         | YSP_009      | 828         | flavin-dependent thymidylate synthase  | 99                               |
| TMA_010     | 516         | YSP_010      | 516         | hypothetical protein                   | 100                              |
| TMA_011     | 474         | YSP_011      | 474         | hypothetical protein                   | 93                               |
| TMA_012     | 1011        | YSP_012      | 1020        | RecA/RadA recombinase                  | 96                               |
| TMA_013     | 576         | YSP_013      | 576         | recombination protein ERF              | 99                               |
| TMA_014     | 1344        | YSP_014      | 1344        | DNA helicase DnaB                      | 100                              |
| TMA_015     | 294         | YSP_015      | 294         | hypothetical protein                   | 100                              |
| TMA_016     | 330         | YSP_016      | 330         | hypothetical protein                   | 100                              |
| TMA_017     | 1110        | YSP_017      | 1110        | IMP dehydrogenase/GMP reductase        | 100                              |
| TMA_018     | 411         | YSP_018      | 411         | DNA binding HTH-domain protein         | 95                               |
| TMA_019     | 1236        | YSP_019      | 1236        | hypothetical protein                   | 94                               |
| TMA_020     | 438         | YSP_020      | 438         | hypothetical protein                   | 100                              |
| TMA_021     | 381         | YSP_021      | 381         | hypothetical protein                   | 98                               |
| TMA_022     | 774         | YSP_022      | 774         | hypothetical protein                   | 98                               |
| TMA_023     | 1677        | YSP_023      | 1677        | DNA primase bacterial DnaG type        | 99                               |
| TMA_024     | 609         | YSP_024      | 609         | thymidine kinase                       | 99                               |
| TMA_025     | 708         | YSP_025      | 714         | ClpP protease                          | 97                               |
| TMA_026     | 927         | YSP_026      | 927         | RecB family exonuclease                | 97                               |
| TMA_027     | 1350        | YSP_027      | 1350        | DEAD domain helicase                   | 99                               |
| TMA_028     | 1401        | YSP_028      | 1401        | hypothetical protein                   | 98                               |
| TMA_029     | 510         | YSP_029      | 510         | sugar-phosphate nucleotidyltransferase | 98                               |
| TMA_030     | 1758        | YSP_030      | 1758        | hypothetical protein                   | 99                               |

|         |      |         |      |                                                             |     |
|---------|------|---------|------|-------------------------------------------------------------|-----|
| TMA_031 | 693  | YSP_031 | 714  | hypothetical protein                                        | 46  |
| TMA_032 | 480  | YSP_032 | 474  | hypothetical protein                                        | 53  |
| TMA_033 | 2112 | YSP_033 | 2112 | DNA polymerase                                              | 99  |
| TMA_034 | 291  | YSP_034 | 291  | hypothetical protein                                        | 97  |
| TMA_035 | 267  | YSP_035 | 267  | hypothetical protein                                        | 98  |
| TMA_036 | 279  | YSP_036 | 279  | hypothetical protein                                        | 96  |
| TMA_037 | 366  | YSP_037 | 366  | hypothetical protein                                        | 97  |
| TMA_038 | 429  | YSP_038 | 429  | deoxycytidylate deaminase                                   | 88  |
|         |      | YSP_039 | 429  | zinc metalloproteinase motif-containing protein             | -   |
| TMA_039 | 525  | YSP_040 | 525  | hypothetical protein                                        | 78  |
| TMA_040 | 2394 | YSP_041 | 2394 | ribonucleotide reductase alpha subunit                      | 90  |
| TMA_041 | 600  | YSP_042 | 600  | ribonucleotide reductase alpha subunit                      | 100 |
| TMA_042 | 207  | YSP_043 | 207  | hypothetical protein                                        | 94  |
| TMA_043 | 453  | YSP_044 | 453  | hypothetical protein                                        | 96  |
| TMA_044 | 330  | YSP_045 | 330  | hypothetical protein                                        | 91  |
| TMA_045 | 216  | YSP_046 | 216  | hypothetical protein                                        | 88  |
| TMA_046 | 444  | YSP_047 | 444  | hypothetical protein                                        | 72  |
| TMA_047 | 309  | YSP_048 | 309  | hypothetical protein                                        | 79  |
| TMA_048 | 348  | YSP_049 | 348  | hypothetical protein                                        | 80  |
| TMA_049 | 456  | YSP_050 | 456  | hypothetical protein                                        | 98  |
| TMA_050 | 1461 | YSP_051 | 1473 | hypothetical protein                                        | 91  |
| TMA_051 | 873  | YSP_052 | 873  | UDP-3-O-[3-hydroxy-myristoyl] glucosamine N-acyltransferase | 86  |
| TMA_052 | 528  | YSP_053 | 528  | hypothetical protein                                        | 73  |
| TMA_053 | 486  | YSP_054 | 486  | hypothetical protein                                        | 87  |
| TMA_054 | 705  | YSP_055 | 702  | Peptidoglycan-binding domain 1 protein                      | 97  |
| TMA_055 | 1023 | YSP_056 | 1023 | conserved bacterial protein                                 | 98  |
| TMA_056 | 1338 | YSP_057 | 1338 | SpoVR                                                       | 100 |
| TMA_057 | 1851 | YSP_058 | 1851 | hypothetical protein                                        | 97  |
| TMA_058 | 1860 | YSP_059 | 1860 | serine kinase                                               | 99  |
| TMA_059 | 588  | YSP_060 | 588  | dNMP kinase                                                 | 100 |
| TM_tRNA | 76   | YS_tRNA | 76   |                                                             | -   |
| TMA_060 | 450  | YSP_061 | 450  | hypothetical protein                                        | 98  |
| TMA_061 | 1860 | YSP_062 | 1869 | terminase large subunit                                     | 98  |
| TMA_062 | 789  | YSP_063 | 789  | hypothetical protein                                        | 99  |
| TMA_063 | 381  | YSP_064 | 381  | hypothetical protein                                        | 99  |

|         |      |         |      |                                                   |     |
|---------|------|---------|------|---------------------------------------------------|-----|
| TMA_064 | 609  | YSP_065 | 552  | TP-like protein (YS40)/hypothetical protein (TMA) | 65  |
| TMA_065 | 267  | YSP_066 | 267  | hypothetical protein                              | 98  |
| TMA_066 | 741  | YSP_067 | 741  | hypothetical protein                              | 100 |
| TMA_067 | 651  | YSP_068 | 651  | hypothetical protein                              | 99  |
| TMA_068 | 1947 | YSP_069 | 1947 | tail sheath protein                               | 99  |
| TMA_069 | 711  | YSP_070 | 711  | hypothetical protein                              | 100 |
| TMA_070 | 663  | YSP_071 | 663  | phage conserved protein                           | 99  |
| TMA_071 | 516  | YSP_072 | 516  | hypothetical protein                              | 97  |
| TMA_072 | 1413 | YSP_073 | 1413 | major structural protein                          | 97  |
| TMA_073 | 1635 | YSP_074 | 1635 | phage prohead protease                            | 98  |
| TMA_074 | 261  | YSP_075 | 261  | hypothetical protein                              | 98  |
| TMA_075 | 4578 | YSP_076 | 4578 | hypothetical protein                              | 99  |
| TMA_076 | 5283 | YSP_077 | 5235 | hypothetical protein                              | 85  |
| TMA_077 | 384  | YSP_078 | 366  | hypothetical protein                              | 89  |
| TMA_078 | 4578 | YSP_079 | 4575 | helicase                                          | 90  |
| TMA_079 | 864  | YSP_080 | 864  | hypothetical protein                              | 99  |
| TMA_080 | 1953 | YSP_081 | 1953 | hypothetical protein                              | 97  |
| TMA_081 | 1881 | YSP_082 | 1839 | hypothetical protein                              | 43  |
| TMA_082 | 243  | YSP_083 | 228  | hypothetical protein                              | 54  |
| TMA_083 | 204  |         |      | hypothetical protein                              | -   |
|         |      | YSP_084 | 231  | hypothetical protein                              | -   |
| TMA_084 | 153  | YSP_085 | 153  | hypothetical protein                              | 98  |
| TMA_085 | 252  | YSP_086 | 252  | hypothetical protein                              | 95  |
|         |      | YSP_087 | 237  | hypothetical protein                              | -   |
| TMA_086 | 249  | YSP_088 | 246  | hypothetical protein                              | 55  |
| TMA_087 | 762  |         |      | hypothetical protein                              | -   |
| TMA_088 | 486  | YSP_089 | 486  | hypothetical protein                              | 73  |
| TMA_089 | 366  | YSP_090 | 456  | hypothetical protein                              | 63  |
| TMA_090 | 231  | YSP_091 | 609  | hypothetical protein                              | 84  |
|         |      | YSP_092 | 435  | hypothetical protein                              | -   |
| TMA_091 | 423  | YSP_093 | 426  | hypothetical protein                              | 55  |
|         |      | YSP_094 | 447  | hypothetical protein                              | -   |
| TMA_092 | 177  | YSP_095 | 177  | hypothetical protein                              | 93  |
| TMA_093 | 183  | YSP_096 | 183  | hypothetical protein                              | 97  |
|         |      | YSP_097 | 408  | hypothetical protein                              | -   |

|         |      |         |      |                      |     |
|---------|------|---------|------|----------------------|-----|
| TMA_094 | 546  | YSP_098 | 546  | hypothetical protein | 97  |
| TMA_095 | 543  | YSP_099 | 543  | hypothetical protein | 96  |
|         |      | YSP_100 | 591  | hypothetical protein | -   |
|         |      | YSP_101 | 513  | hypothetical protein | -   |
| TMA_096 | 537  | YSP_102 | 537  | hypothetical protein | 99  |
| TMA_097 | 486  | YSP_103 | 489  | hypothetical protein | 95  |
| TMA_098 | 516  | YSP_104 | 516  | hypothetical protein | 95  |
|         |      | YSP_105 | 531  | hypothetical protein | -   |
| TMA_099 | 135  |         |      | hypothetical protein | -   |
| TMA_100 | 150  |         |      | hypothetical protein | -   |
| TMA_101 | 333  | YSP_106 | 522  | hypothetical protein | 97  |
| TMA_102 | 186  |         |      | hypothetical protein | -   |
| TMA_103 | 288  |         |      | hypothetical protein | -   |
| TMA_104 | 507  |         |      | hypothetical protein | -   |
| TMA_105 | 1710 | YSP_107 | 1689 | hypothetical protein | 88  |
| TMA_106 | 1044 | YSP_108 | 1044 | ATPase               | 95  |
| TMA_107 | 696  | YSP_109 | 696  | hypothetical protein | 99  |
| TMA_108 | 747  | YSP_110 | 747  | hypothetical protein | 94  |
| TMA_109 | 393  | YSP_111 | 393  | hypothetical protein | 85  |
| TMA_110 | 534  | YSP_112 | 546  | hypothetical protein | 96  |
|         |      | YSP_113 | 540  | hypothetical protein | -   |
| TMA_111 | 492  | YSP_114 | 492  | glycosyltransferase  | 100 |
| TMA_112 | 243  | YSP_115 | 243  | hypothetical protein | 98  |
| TMA_113 | 477  | YSP_116 | 477  | hypothetical protein | 98  |
| TMA_114 | 558  | YSP_117 | 558  | hypothetical protein | 96  |
| TMA_115 | 552  | YSP_118 | 552  | hypothetical protein | 97  |
| TMA_116 | 567  | YSP_119 | 567  | hypothetical protein | 91  |
| TMA_117 | 450  | YSP_120 | 450  | hypothetical protein | 97  |
| TMA_118 | 495  | YSP_121 | 495  | hypothetical protein | 98  |
| TMA_119 | 504  | YSP_122 | 504  | hypothetical protein | 99  |
| TMA_120 | 519  | YSP_123 | 519  | hypothetical protein | 96  |
|         |      | YSP_124 | 492  | hypothetical protein | -   |
| TMA_121 | 513  | YSP_125 | 516  | hypothetical protein | 68  |
| TMA_122 | 585  | YSP_126 | 585  | hypothetical protein | 98  |
| TMA_123 | 498  | YSP_127 | 498  | hypothetical protein | 99  |

|         |      |         |      |                            |     |
|---------|------|---------|------|----------------------------|-----|
| TMA_124 | 471  | YSP_128 | 471  | hypothetical protein       | 98  |
| TMA_125 | 513  | YSP_129 | 513  | hypothetical protein       | 98  |
| TMA_126 | 507  | YSP_130 | 507  | hypothetical protein       | 98  |
| TMA_127 | 429  | YSP_131 | 429  | hypothetical protein       | 96  |
| TMA_128 | 537  | YSP_132 | 537  | hypothetical protein       | 100 |
| TMA_129 | 648  | YSP_133 | 648  | hypothetical protein       | 99  |
| TMA_130 | 345  | YSP_134 | 570  | hypothetical protein       | 90  |
| TMA_131 | 1470 |         |      | transposase                | -   |
| TMA_132 | 561  |         |      | resolvase-like protein     | -   |
| TMA_133 | 573  | YSP_135 | 573  | hypothetical protein       | 98  |
| TMA_134 | 423  | YSP_136 | 423  | hypothetical protein       | 98  |
| TMA_135 | 660  | YSP_137 | 660  | hypothetical protein       | 99  |
| TMA_136 | 564  | YSP_138 | 564  | hypothetical protein       | 98  |
| TMA_137 | 1605 | YSP_139 | 1605 | hypothetical protein       | 96  |
| TM_tRNA | 77   | YS_tRNA | 77   |                            | -   |
| TM_tRNA | 77   | YS_tRNA | 77   |                            | -   |
| TMA_138 | 552  | YSP_140 | 552  | hypothetical protein       | 98  |
| TMA_139 | 174  | YSP_141 | 174  | hypothetical protein       | 87  |
| TMA_140 | 3045 | YSP_142 | 3045 | hypothetical protein       | 98  |
| TMA_141 | 525  | YSP_143 | 525  | hypothetical protein       | 99  |
| TMA_142 | 1041 | YSP_144 | 1041 | M27/M37 peptidase          | 95  |
| TMA_143 | 951  | YSP_145 | 951  | hypothetical protein       | 100 |
| TMA_144 | 261  | YSP_146 | 261  | hypothetical protein       | 100 |
| TMA_145 | 186  | YSP_147 | 186  | hypothetical protein       | 100 |
| TMA_146 | 396  | YSP_148 | 396  | hypothetical protein       | 99  |
| TMA_147 | 489  | YSP_149 | 489  | hypothetical protein       | 99  |
| TMA_148 | 1989 | YSP_150 | 1989 | baseplate assembly protein | 99  |
| TMA_149 | 1896 | YSP_151 | 1896 | hypothetical protein       | 89  |
| TMA_150 | 2391 | YSP_152 | 2391 | wac fibrin neck whisker    | 89  |
| TMA_151 | 2112 | YSP_153 | 2112 | hypothetical protein       | 97  |
| TMA_152 | 900  | YSP_154 | 900  | hypothetical protein       | 98  |
| TMA_153 | 351  | YSP_155 | 351  | hypothetical protein       | 100 |
| TMA_154 | 864  | YSP_156 | 864  | hypothetical protein       | 100 |
| TMA_155 | 801  | YSP_157 | 801  | hypothetical protein       | 99  |
| TMA_156 | 4044 | YSP_158 | 4044 | hypothetical protein       | 98  |

|         |      |         |      |                                |     |
|---------|------|---------|------|--------------------------------|-----|
| TMA_157 | 525  | YSP_159 | 525  | hypothetical protein           | 99  |
| TMA_158 | 213  | YSP_160 | 213  | hypothetical protein           | 100 |
| TMA_159 | 1068 | YSP_161 | 1068 | radical SAM superfamily enzyme | 99  |
| TMA_160 | 954  | YSP_162 | 954  | hypothetical protein           | 98  |
| TMA_161 | 633  | YSP_163 | 633  | hypothetical protein           | 98  |
| TMA_162 | 546  | YSP_164 | 546  | hypothetical protein           | 99  |
| TMA_163 | 630  | YSP_165 | 630  | hypothetical protein           | 99  |
| TMA_164 | 390  | YSP_166 | 390  | hypothetical protein           | 97  |
| TMA_165 | 1494 | YSP_167 | 1494 | hypothetical protein           | 98  |
| TMA_166 | 1086 | YSP_168 | 1086 | hypothetical protein           | 99  |
| TMA_167 | 570  | YSP_169 | 570  | hypothetical protein           | 98  |
| TMA_168 | 264  | YSP_170 | 264  | hypothetical protein           | 100 |

---

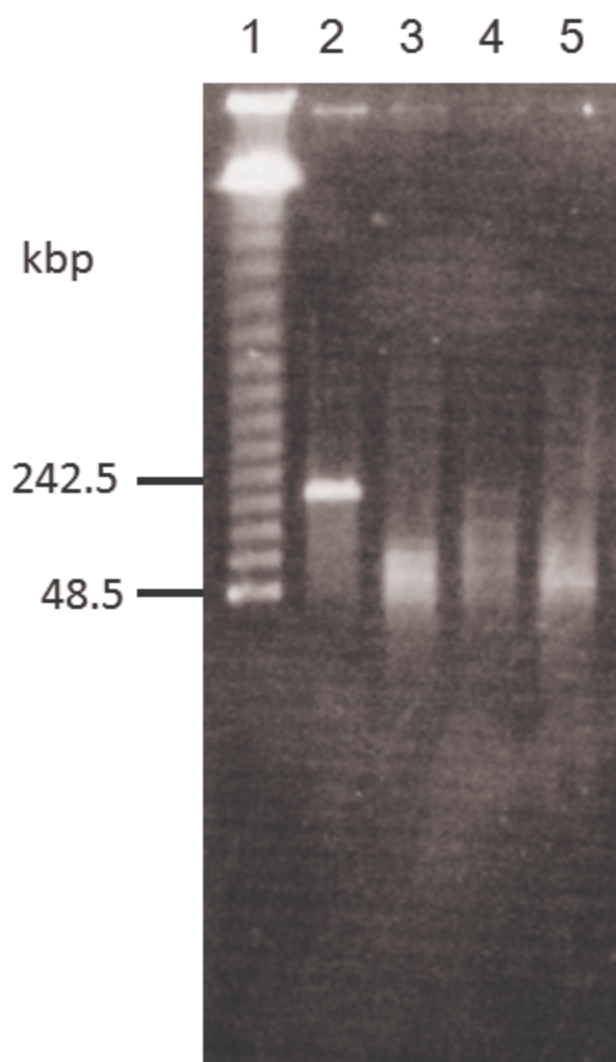

Figure S1. PFGE of  $\phi$ YS40 DNA. Lane1, lambda DNA ladders; lane2, intact DNA; lane 3-5, *Cfr10I*-, *AcdI*- and *SacI*-digested DNA, respectively.
